# Supplementary material for: Role of intermolecular charge transfer towards fluorometric detection of fluoride ions with anthrapyrazolone derivatives
Source: Royal Society of Chemistry journal article supplement (doi:10.1039/d4ma00738g), 2024-01-01
Supplement: d4ma00738g1.pdf [file d4ma00738g1.pdf]

## Supporting Information

### Role of Intermolecular Charge Transfer towards Fluorometric Detection of Fluoride Ion with Anthrapyrazolone Derivatives

Gomathi Sivakumar<sup>a</sup>, Anashwara Babu<sup>a</sup>, Anubhab Das<sup>a</sup>, Mageshwari Anandhan<sup>a</sup>, Venkatramaiah Nutalapati<sup>a\*</sup> and Samarendra Maji<sup>a\*</sup>

<sup>a</sup>Department of Chemistry, Faculty of Engineering and Technology, SRM Institute of Science and Technology (SRMIST), Kattankulathur, Tamil Nadu- 603203, India.

\*Corresponding author E-mail: [nvenkat83@gmail.com](mailto:nvenkat83@gmail.com)/[venkatrv1@srmist.edu.in](mailto:venkatrv1@srmist.edu.in),  
[samarenr@srmist.edu.in](mailto:samarenr@srmist.edu.in)

## 1. Characterization

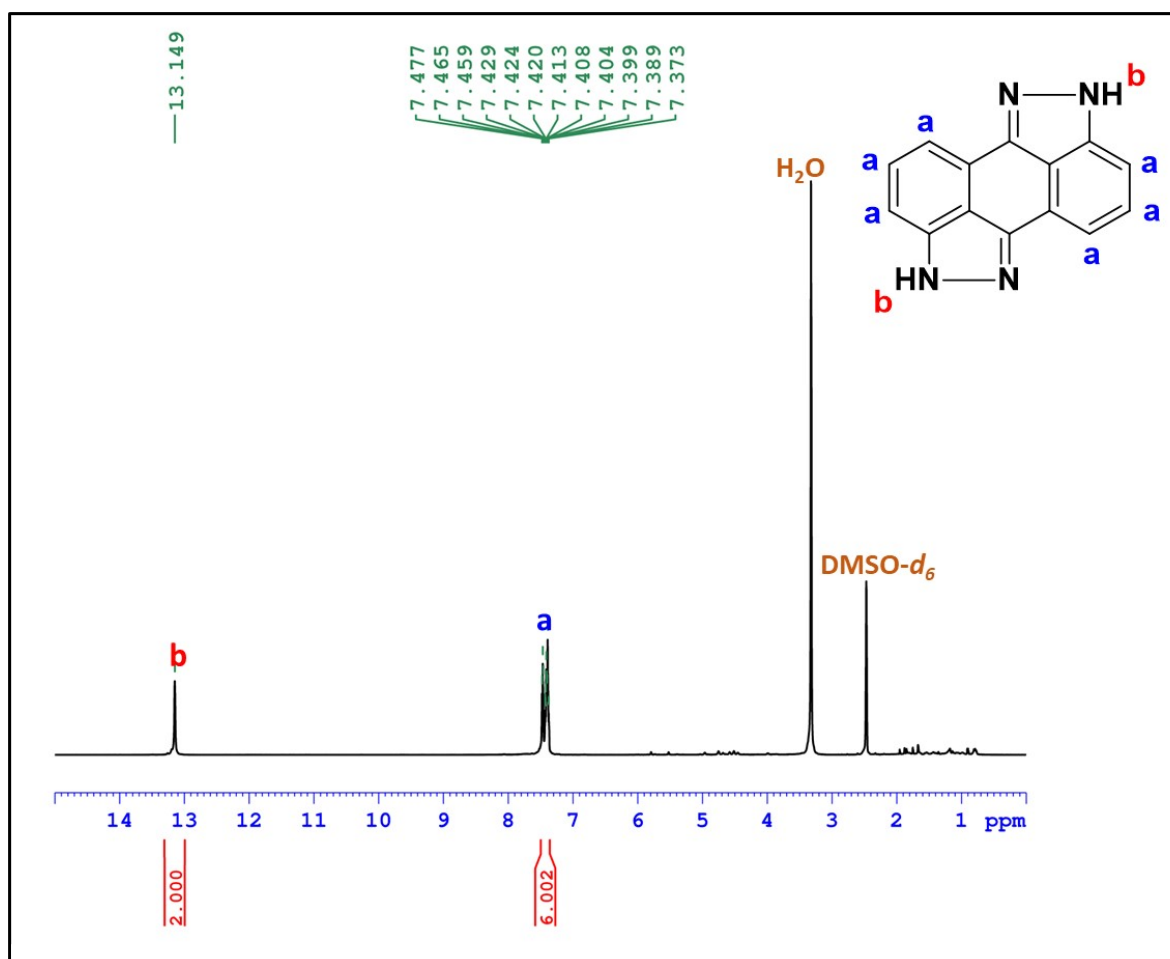

Fig. S1.  $^1\text{H}$  NMR spectrum of DHBBI, measured in  $\text{DMSO-}d_6$

$^1\text{H}$  NMR (500 MHz,  $\text{DMSO-}d_6$ )  $\delta$  ppm: 13.149 (s, 2H), 7.47 – 7.37 (m, 6H).

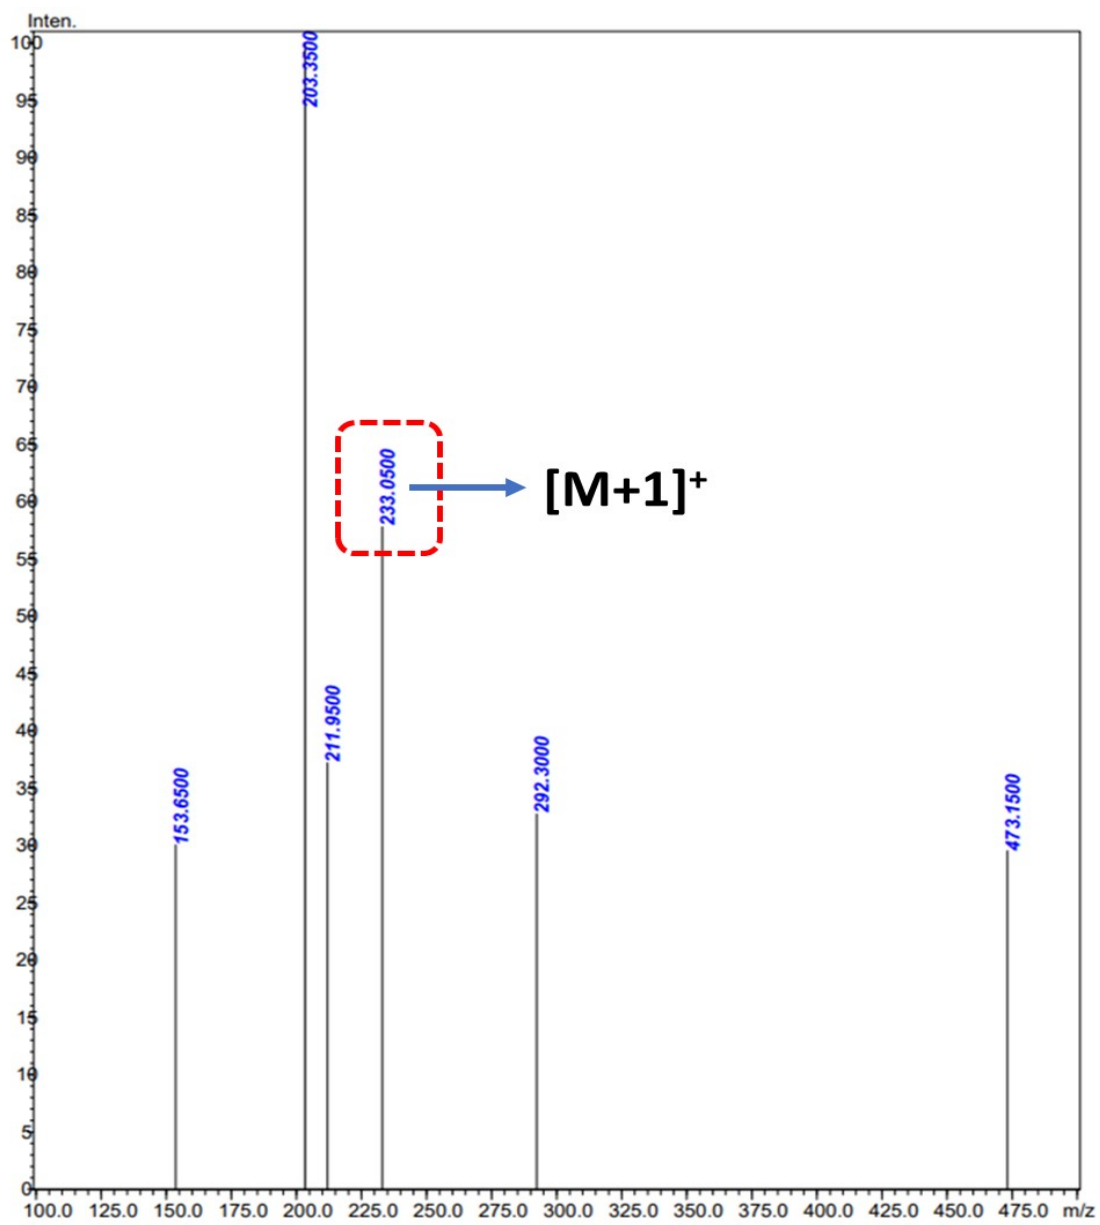

Fig. S2. ESI Mass spectrum of DHBBI.

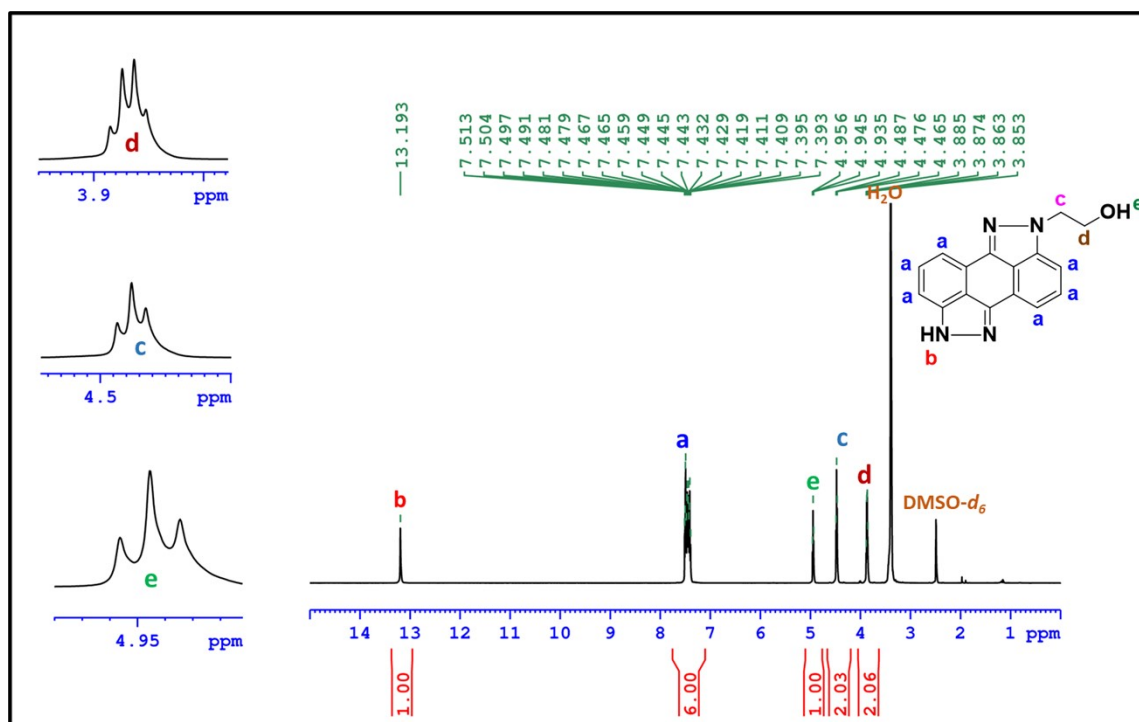

Fig. S3.  $^1\text{H-NMR}$  spectrum of DHBBI-OH, measured in  $\text{DMSO-}d_6$ .

$^1\text{H-NMR}$  (500 MHz,  $\text{DMSO-}d_6$ )  $\delta$  ppm: 13.19 (s, 1H), 7.51 – 7.40 (m, 6H), 4.97 (t,  $J = 5.1$  Hz, 1H), 4.50 (t,  $J = 5.4$  Hz, 2H), 3.89 (q,  $J = 5.6$  Hz, 2H).

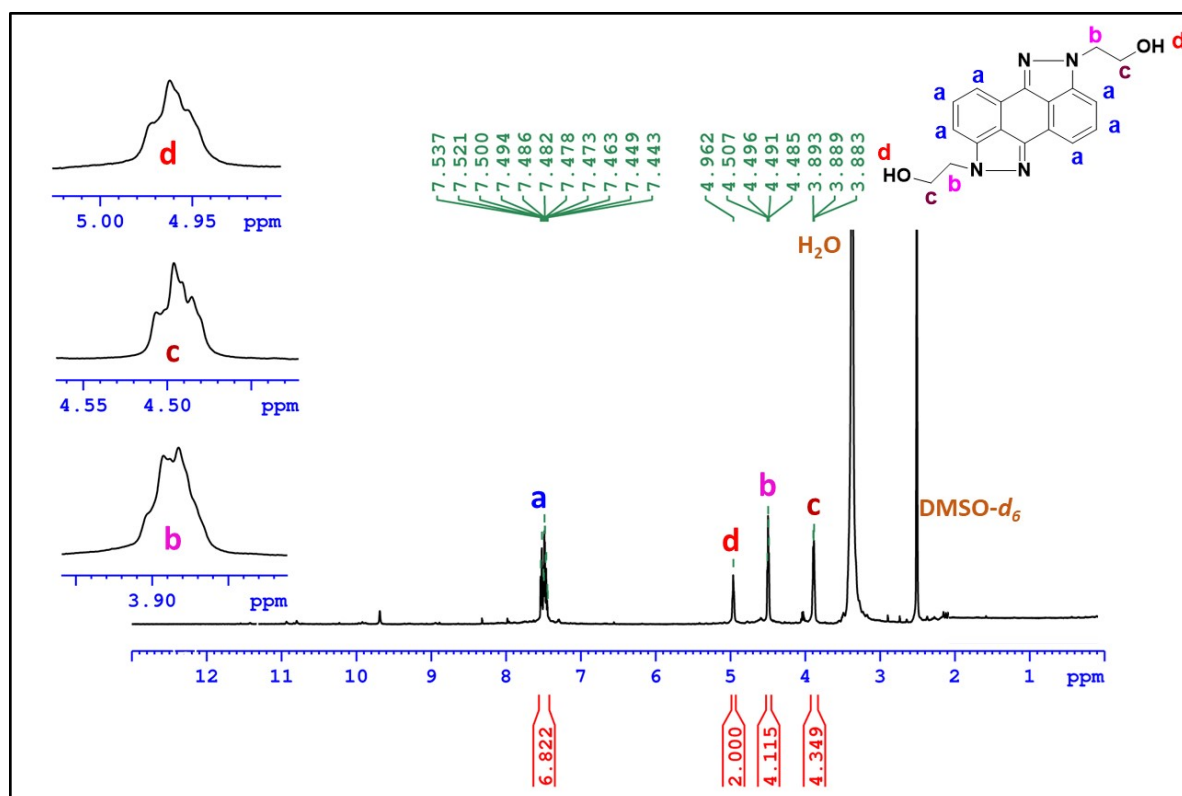

Fig. S4.  $^1\text{H}$  NMR spectrum of DHBBI-2-OH, measured in  $\text{DMSO-}d_6$ .

$^1\text{H}$  NMR (500 MHz,  $\text{DMSO-}d_6$ )  $\delta$  ppm: 7.53 – 7.44 (m, 6H), 4.9 (t,  $J = 4.75$  Hz, 2H), 4.490 (t,  $J = 5.45$  Hz, 4H), 3.89 (q,  $J = 5.5$  Hz, 4H)

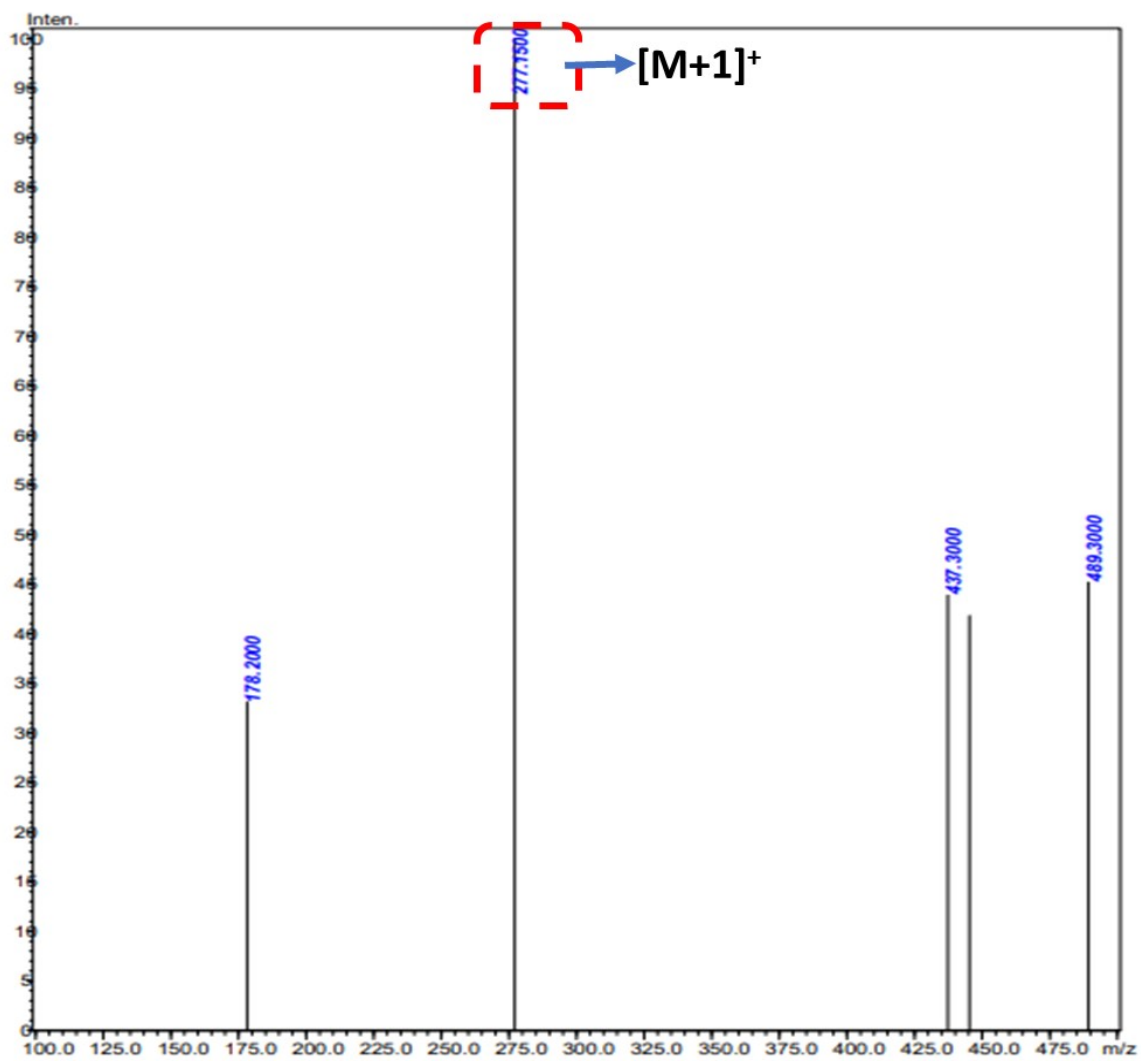

Fig. S5. ESI Mass spectrum of DHBBI-OH.

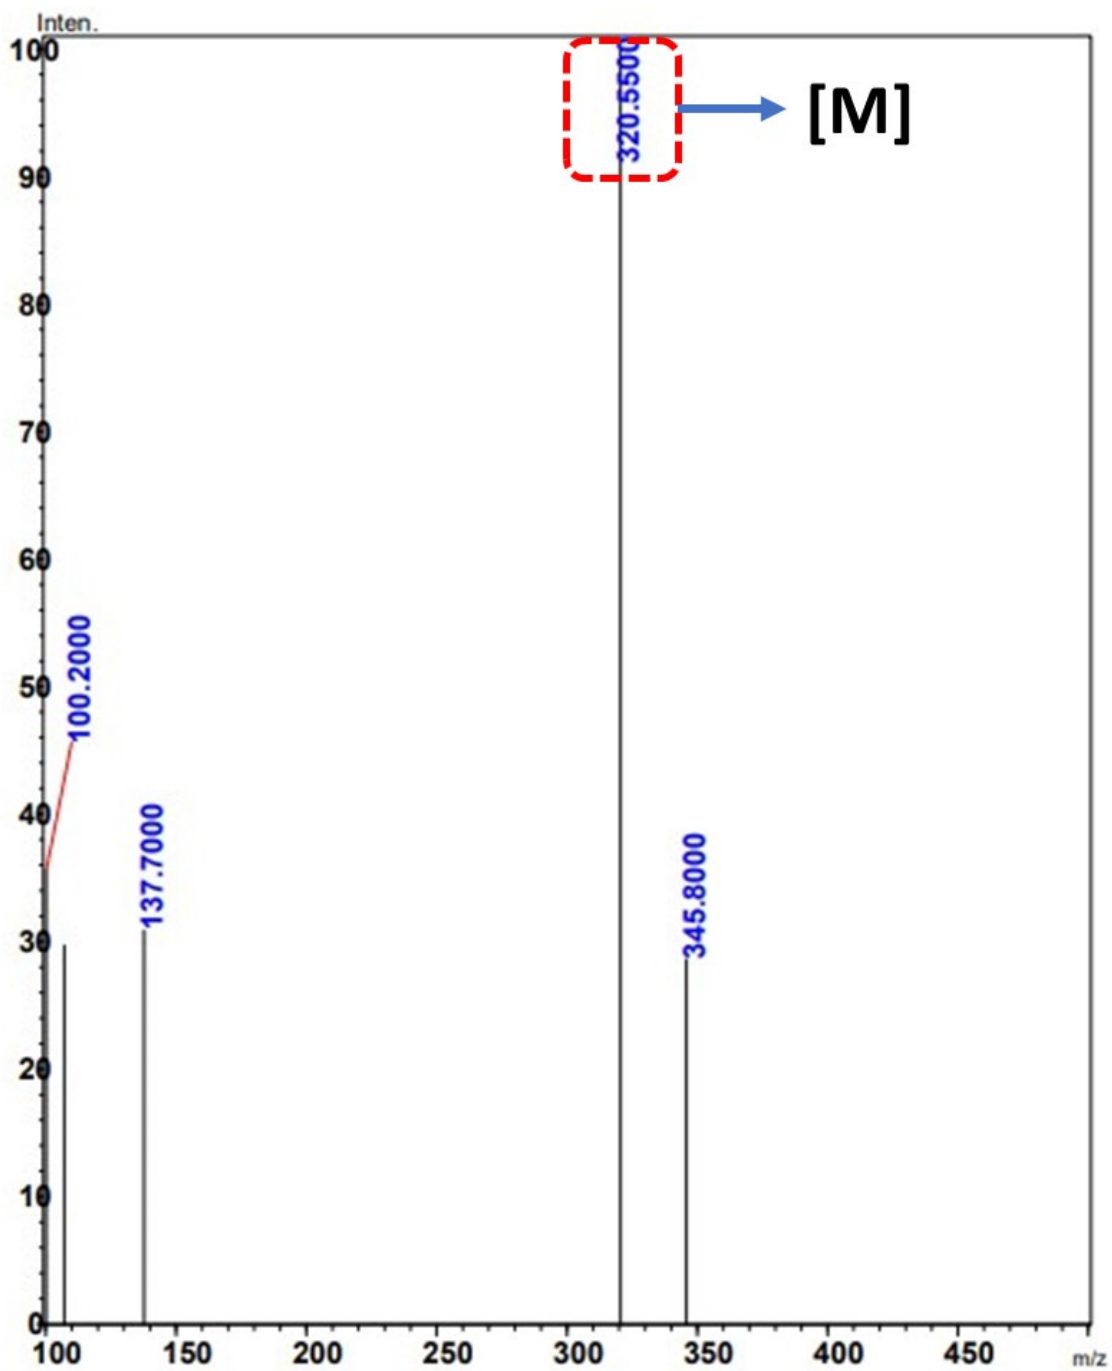

Fig. S6. ESI Mass spectrum of DHBBI-2-OH.

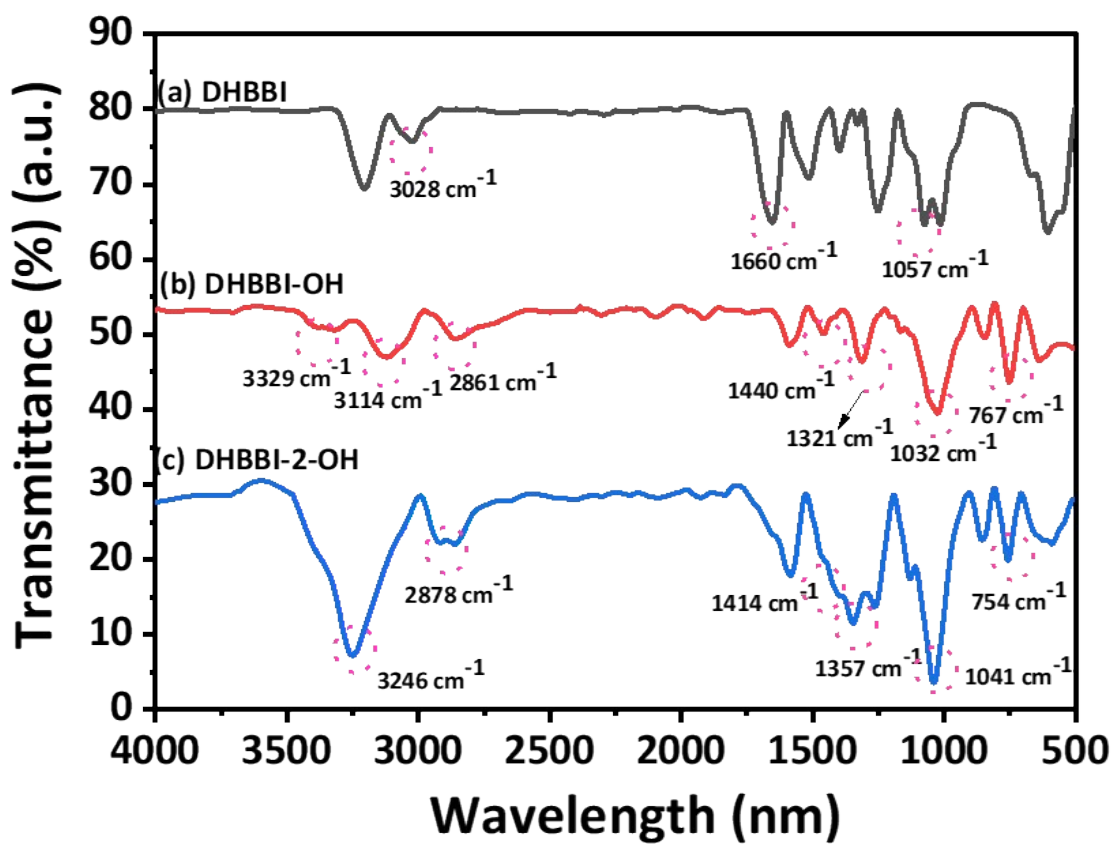

Fig. S7. FTIR spectra of DHBBI, DHBBI-OH and DHBBI-2-OH.



Table S1. Selected Bond parameters of compounds DHBBI, DHBBI-OH, and DHBBI-2-OH from DFT studies.

| Atom No.                              | DHBBI            | DHBBI-OH     | DHBBI-2-OH |
|---------------------------------------|------------------|--------------|------------|
|                                       | Bond lengths (Å) |              |            |
| C1-H19, C11-H24,<br>C5-H21, C13-H22   | 1.082            | ≈1.085       | 1.083      |
| C6-H20, C12-H23                       | 1.084            | 1.084        | 1.084      |
| C7-C3, C9-C8                          | 1.432            | 1.432        | 1.430      |
| C8-C4, C10-C7                         | 1.459            | 1.458        | 1.458      |
| C10=C9, C4-C3, C2-<br>C1, C13=C14     | 1.406            | 1.406        | 1.406      |
| C3=C2, C9-C14                         | 1.403            | 1.403        | 1.403      |
| C1=C6, C13-C12                        | 1.395            | 1.395        | 1.395      |
| C6-C5, C12=C11                        | 1.415            | 1.415        | 1.415      |
| C5=C4, C11-C10                        | 1.393            | 1.393        | 1.393      |
| C7=N17, C8=N16                        | 1.337            | 1.337        | 1.338      |
| C2-N18, C14-N15                       | 1.381            | 1.381±2      | 1.382      |
| N16-N15, N17- N18                     | 1.418            | 1.418, 1.421 | 1.420      |
| N18-H26, N15-H25                      | 1.010            | -            | -          |
| N18-C26                               | -                | 1.461        | 1.460      |
| C26-C29                               | -                | 1.547        | 1.533      |
| C26-H27, C26-H28,<br>C29-H30, C29-H31 | -                | 1.099        | -          |
| C25-H26, C25-H27,<br>C33-H34, C33-H35 | -                | -            | 1.092      |
| C28-H29, C28-H30,<br>C36-H37, C36-H38 | -                | -            | 1.097      |
| C29-O33                               | -                | 1.456        | -          |
| O33-H32                               | -                | 0.995        | -          |
| C28-O31, C36-O39                      | -                | -            | 1.458      |

|                             |                |         |         |
|-----------------------------|----------------|---------|---------|
| O31-H32, O39-H40            |                |         | 1.093   |
|                             | Bond angles    |         |         |
| H25-N15-N16                 | 117.98         | 117.98  | -       |
| H26-N18-N17                 | 117.98         | -       | -       |
| N16-C8-C4                   | 130.93         | 130.92  | 131.17  |
| N17-C7-C10                  | 130.93         | 131.11  | 131.17  |
| H26-N18-C2                  | 179.94         | -       | -       |
| H25-N15-C14                 | 179.94         | 179.94  | -       |
| C26-N18-N17                 | -              | 117.96  | -       |
| C26-C29-O32                 | -              | 110.30  | -       |
| H33-O32-O29                 | -              | 107.56  | -       |
| C26-N18-C2                  | -              | 130.22  | -       |
| C25-N15-N16, C33-N18-N17    | -              | -       | 118.22  |
| C25-C28-O31, C33-C36-O39    | -              | -       | 147.76  |
| H40-O39-C36, H32-O31-C28    | -              | -       | 108.13  |
|                             | Dihedral angle |         |         |
| H26-N18-N17-C7              | 179.98         | -       | -       |
| N17-C7-C10-C9, N16-C8-C4-C3 | 179.99         | 179.92  | 179.92  |
| C7-N17-N18-C2               | 0.00487        | 0.462   | 0.3461  |
| C8-N16-N5-C14               | 0.00435        | 0.00390 | 0.3462  |
| C4-C3-C7-C10                | 0.00026        | 0.00846 | 0.06836 |
| C1-C6-C5-C4                 | 0.00148        | 0.0423  | 0.01242 |
| H22-C13-C12-H23             | 0.03292        | 0.00458 | 0.0133  |
| H19 -C1-C6-H20              | 0.00734        | 0.1154  | 0.0133  |
| N17-N18-C26-C29             | -              | 65.79   | -       |
| N18-C26-C29-O32             | -              | 175.21  | -       |
| H27-C26-C29-H31             | -              | 60.55   | -       |

|                                     |   |        |        |
|-------------------------------------|---|--------|--------|
| H31-C29-O32-H33                     | - | 49.78  | -      |
| C26-N18-N17-C7                      | - | 176.99 | -      |
| N16-N15-C25-C28,<br>N17-N18-C33-C36 | - | -      | 53.39  |
| O31-C28-C25-N15,<br>N18-C33-C36-O39 | - | -      | 179.98 |

Table S2. Absorption spectra data obtained by TD-DFT methods for DHBBI, DHBBI-OH and DHBBI-2-OH compounds at B3LYP/6-31g\* (d,p) optimized geometries.

| Compounds  | Electronic transition | E (eV) | $\lambda$ (nm) (theo.) | Oscillator strength (f) | Composition                                                                         | Major contribution     |
|------------|-----------------------|--------|------------------------|-------------------------|-------------------------------------------------------------------------------------|------------------------|
| DHBBI      | $S_0 \rightarrow S_1$ | 3.4391 | 360.51                 | 0.3703                  | HOMO $\rightarrow$ LUMO                                                             | 97.3                   |
| DHBBI-OH   | $S_0 \rightarrow S_1$ | 3.3510 | 369.99                 | 0.3978                  | HOMO $\rightarrow$ LUMO                                                             | 97.39                  |
|            | $S_0 \rightarrow S_2$ | 4.0108 | 309.13                 | 0.0027                  | HOMO-3 $\rightarrow$ LUMO<br>HOMO-1 $\rightarrow$ LUMO<br>HOMO $\rightarrow$ LUMO+1 | 5.14<br>85.54<br>4.93  |
|            | $S_0 \rightarrow S_3$ | 4.3748 | 283.40                 | 0.0002                  | HOMO-3 $\rightarrow$ LUMO<br>HOMO-1 $\rightarrow$ LUMO<br>HOMO $\rightarrow$ LUMO+1 | 11.56<br>3.73<br>80.30 |
| DHBBI-2-OH | $S_0 \rightarrow S_1$ | 3.2887 | 377.01                 | 0.4325                  | HOMO $\rightarrow$ LUMO                                                             | 97.93                  |

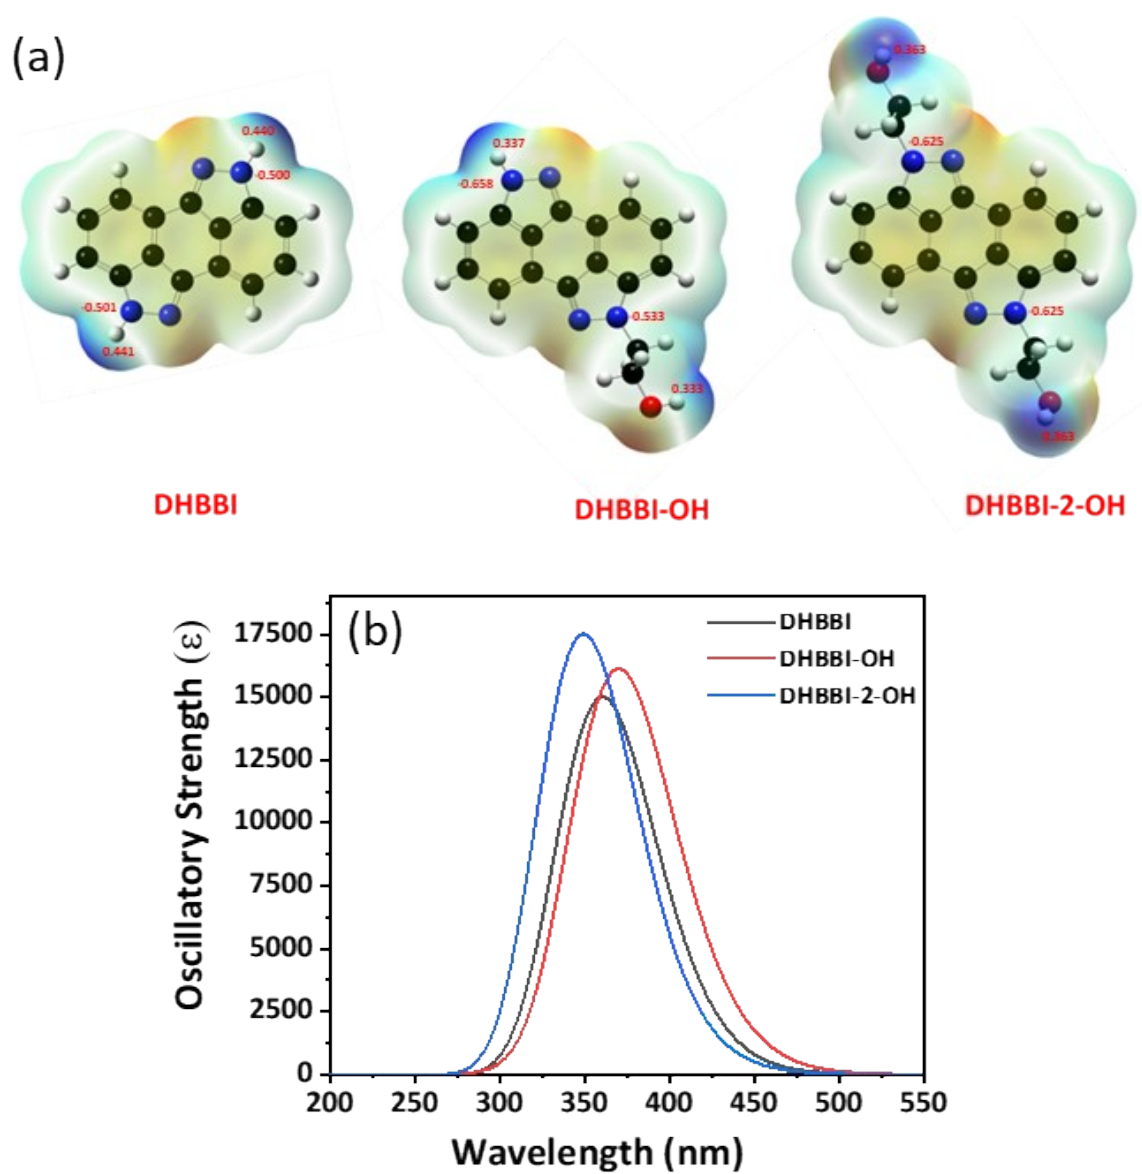

Fig. S8. (a) Calculated electrostatic potential surfaces on the molecular surfaces and (b) Calculated UV-Vis spectra of DHBBI, DHBBI-OH, and DHBBI-2-OH at B3LYP/6-31g\*(d,p).

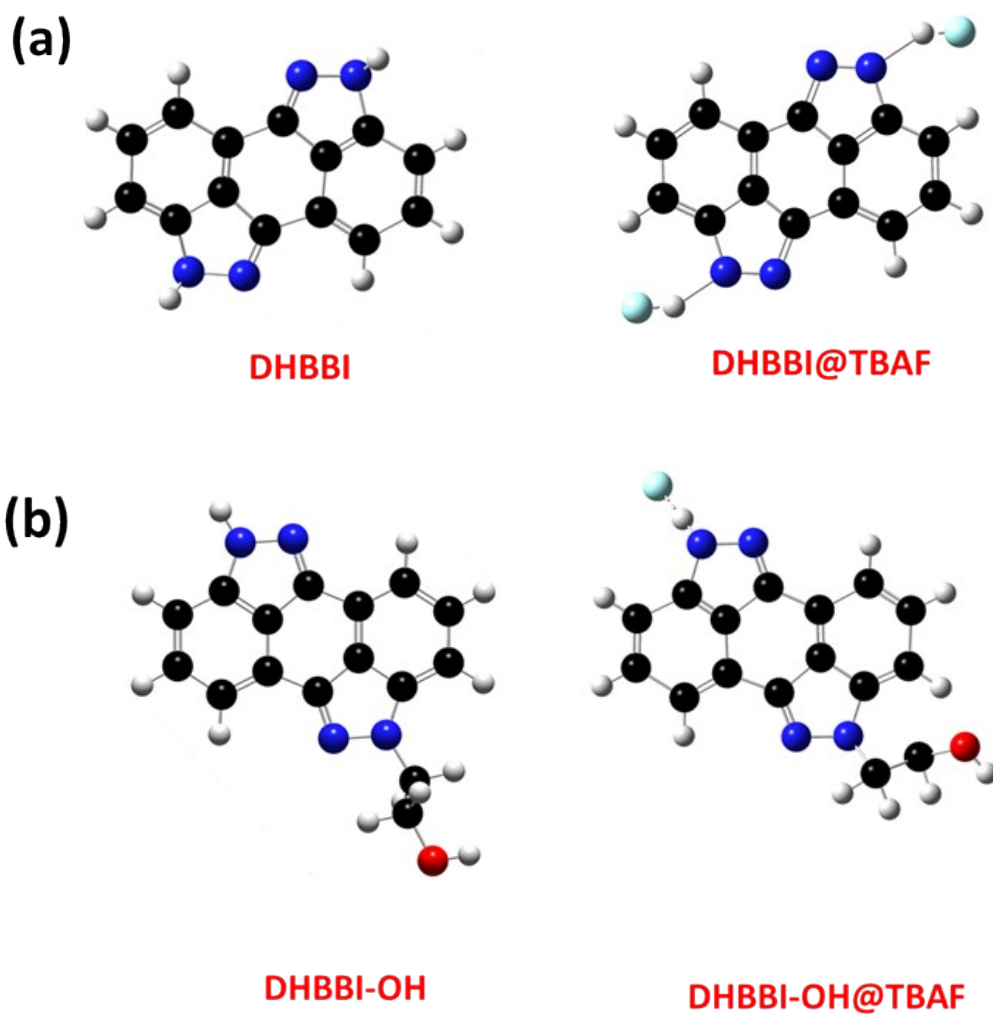

Fig. S9. Optimized geometry of complexation of TBAF with (a) DHBBI and (b) DHBBI-OH molecule obtained using DFT/B3LYP/6-31g\* theoretical mode.

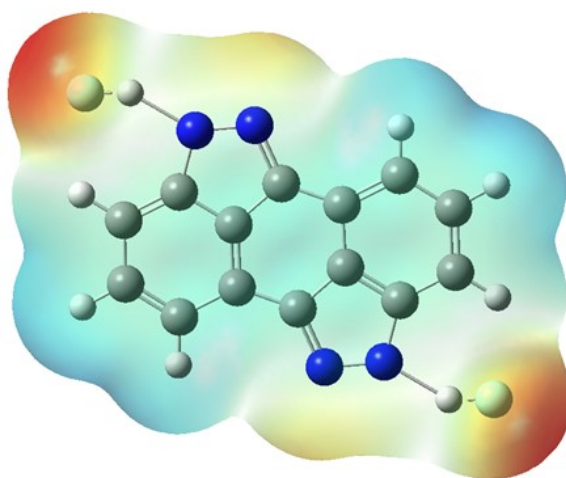

**DHBBI@TBAF**

Fig. S10. Calculated electrostatic potential surfaces on the molecular surfaces of complexation of TBAF, TBACN and TBAOH with DHBBI.

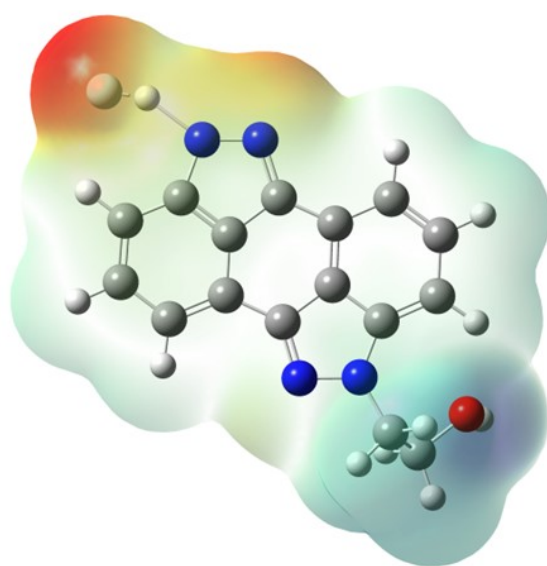

**DHBBI-OH@TBAF**

Fig. S11. Calculated electrostatic potential surfaces on the molecular surfaces of complexation of TBAF, TBACN and TBAOH with DHBBI-OH.



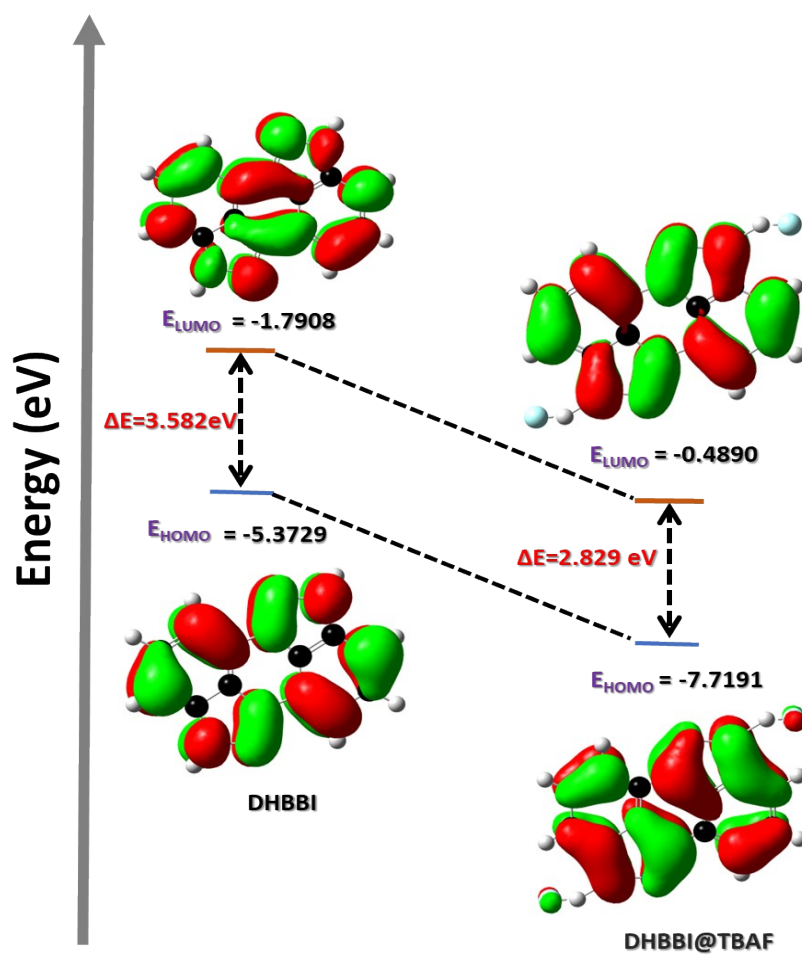

Fig. S12. Energy profile diagram showing variation in the HOMO and LUMO gap on complexation of TBAF with DHBBI.

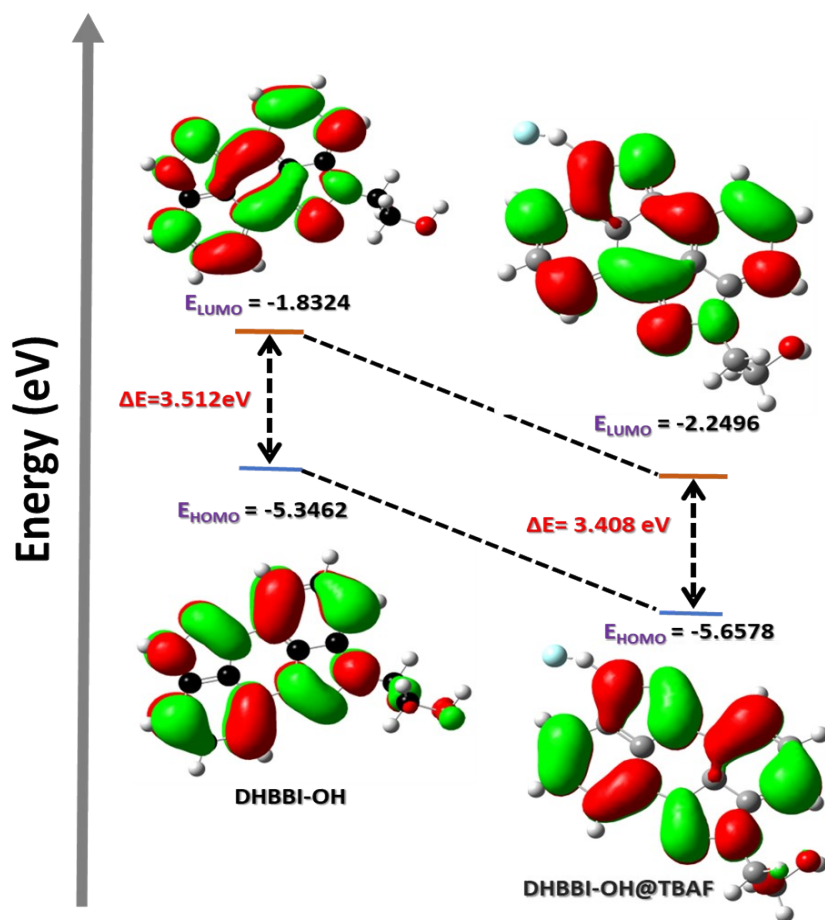

Fig. S13. Energy profile diagram showing variation in the HOMO-LUMO gap on complexation of TBAF with DHBBI-OH.

Table S3. Absorption spectra data obtained by TD-DFT methods for TBAF, TBACN and TBAOH complex with DHBBI compound at B3LYP/6-31g\* (d,p) optimized geometries.

| Compounds      | Electronic transition | E (eV) | $\lambda$ (nm) (theo.) | Oscillator strength (f) | Composition                                                      | Major contribution |
|----------------|-----------------------|--------|------------------------|-------------------------|------------------------------------------------------------------|--------------------|
| DHBBI          | $S_0 \rightarrow S_1$ | 3.4391 | 360.51                 | 0.3703                  | HOMO $\rightarrow$ LUMO                                          | 97.3               |
| DHBBI@<br>TBAF | $S_0 \rightarrow S_2$ | 2.2500 | 551.03                 | 0.0014                  | HOMO-2 $\rightarrow$<br>LUMO                                     | 98.40              |
|                | $S_0 \rightarrow S_3$ | 2.4088 | 514.72                 | 0.0063                  | HOMO-5 $\rightarrow$<br>LUMO<br><br>HOMO-3 $\rightarrow$<br>LUMO | 7.78<br><br>90.66  |

Table S4. Absorption spectra data obtained by TD-DFT methods for TBAF, TBACN, and TBAOH complex with DHBBI-OH compound at B3LYP/6-31g\* (d,p) optimized geometries.

| Compounds      | Electronic transition | E (eV) | $\lambda$ (nm) (theo.) | Oscillator strength (f) | Composition                                                                                                                                                            | Major contribution                              |
|----------------|-----------------------|--------|------------------------|-------------------------|------------------------------------------------------------------------------------------------------------------------------------------------------------------------|-------------------------------------------------|
| DHBBI-OH       | $S_0 \rightarrow S_1$ | 3.3510 | 369.99                 | 0.3978                  | HOMO $\rightarrow$ LUMO                                                                                                                                                | 97.39                                           |
|                | $S_0 \rightarrow S_2$ | 4.0108 | 309.13                 | 0.0027                  | HOMO-3 $\rightarrow$ LUMO<br>HOMO-1 $\rightarrow$ LUMO<br>HOMO $\rightarrow$ LUMO+1                                                                                    | 5.14<br>85.54<br>4.93                           |
|                | $S_0 \rightarrow S_3$ | 4.3748 | 283.40                 | 0.0002                  | HOMO-3 $\rightarrow$ LUMO<br>HOMO-1 $\rightarrow$ LUMO<br>HOMO $\rightarrow$ LUMO+1                                                                                    | 11.56<br>3.73<br>80.30                          |
| DHBBI-OH @TBAF | $S_0 \rightarrow S_1$ | 1.7201 | 720.81                 | 0.0391                  | HOMO-8 $\rightarrow$ LUMO<br>HOMO-6 $\rightarrow$ LUMO<br>HOMO-3 $\rightarrow$ LUMO<br>HOMO-1 $\rightarrow$ LUMO<br>HOMO $\rightarrow$ LUMO<br>LUMO $\rightarrow$ HOMO | 8.60<br>2.67<br>17.51<br>17.42<br>49.93<br>2.40 |
|                | $S_0 \rightarrow S_2$ | 1.9957 | 621.25                 | 0.0329                  | HOMO-9 $\rightarrow$ LUMO<br>HOMO-3 $\rightarrow$ LUMO<br>HOMO-2 $\rightarrow$ LUMO<br>HOMO-1 $\rightarrow$ LUMO<br>HOMO $\rightarrow$ LUMO                            | 2.10<br>5.78<br>19.28<br>33.24<br>36.04         |
|                | $S_0 \rightarrow S_3$ | 2.2500 | 551.05                 | 0.0139                  | HOMO-9 $\rightarrow$ LUMO<br>HOMO-8 $\rightarrow$ LUMO                                                                                                                 | 20.04<br>2.21                                   |

|  |  |  |  |  |               |       |
|--|--|--|--|--|---------------|-------|
|  |  |  |  |  | HOMO-3→LUMO   | 10.89 |
|  |  |  |  |  | HOMO-2 → LUMO | 50.49 |
|  |  |  |  |  | HOMO-1 → LUMO | 2.56  |
|  |  |  |  |  | HOMO → LUMO   | 9.39  |

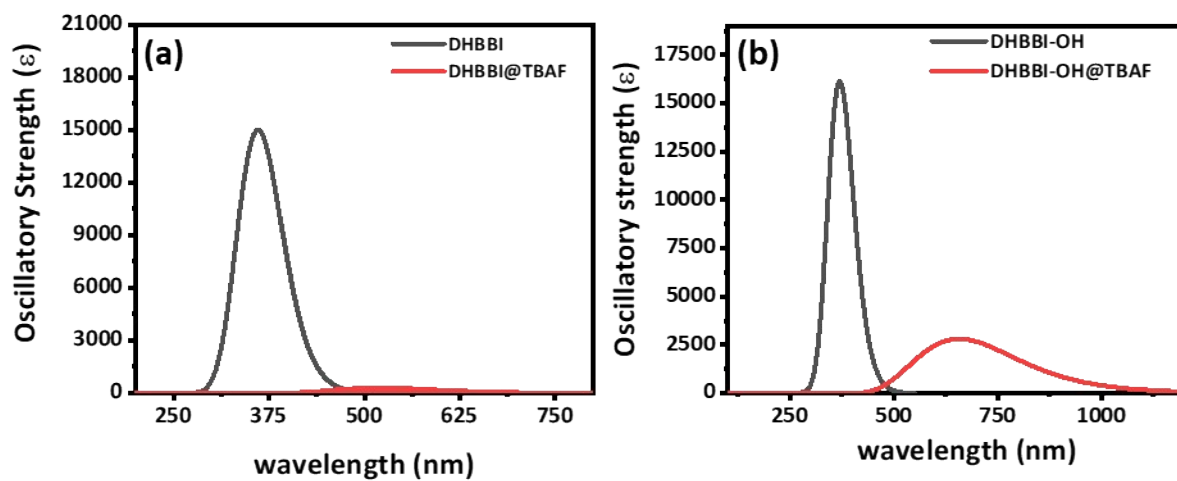

Fig. S14. Calculated UV-Vis spectra of TBAF complexes of (a) DHBBI and (b) DHBBI-OH at B3LYP/6-31g\*(d,p).

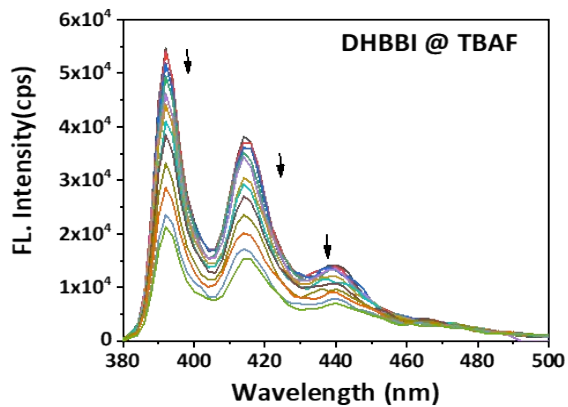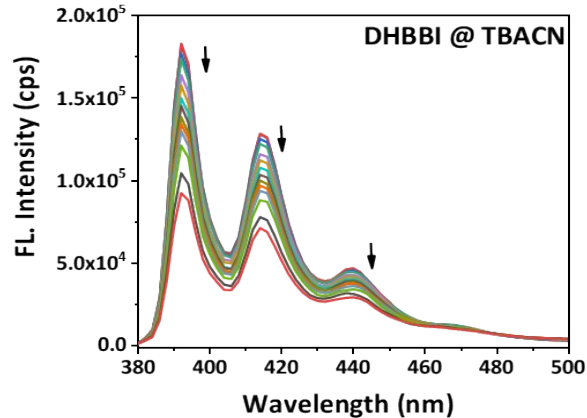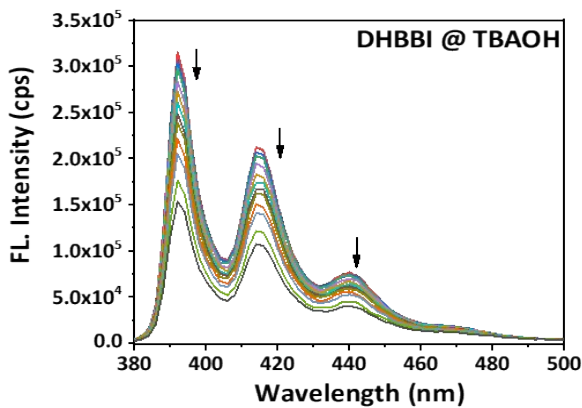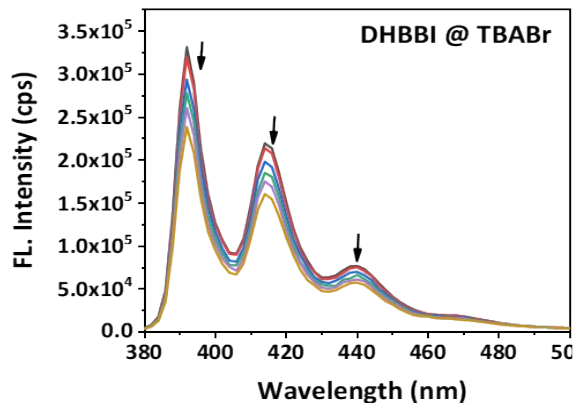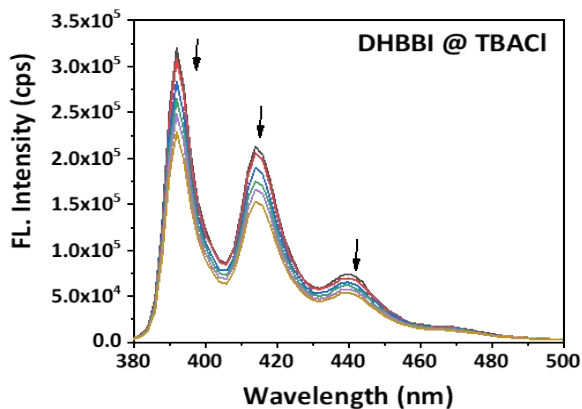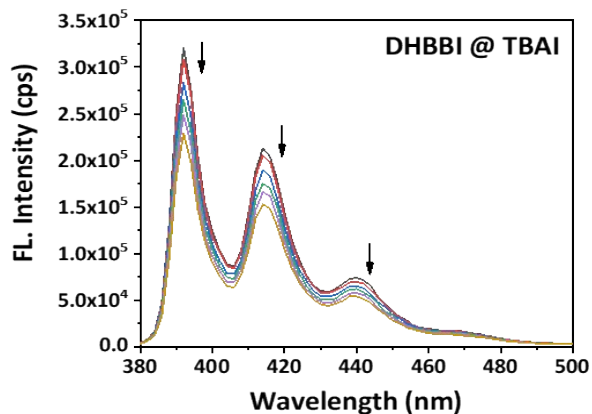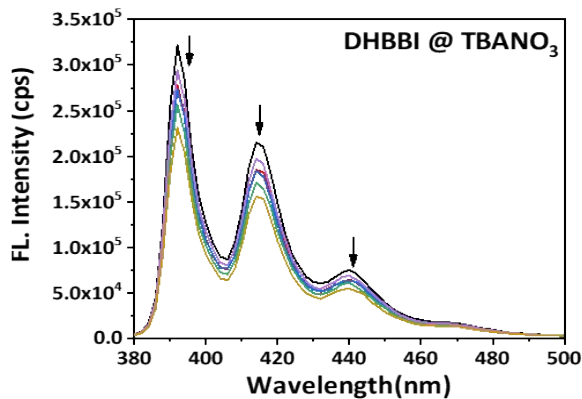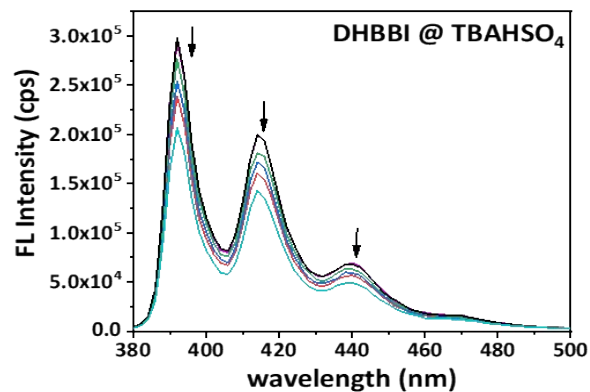

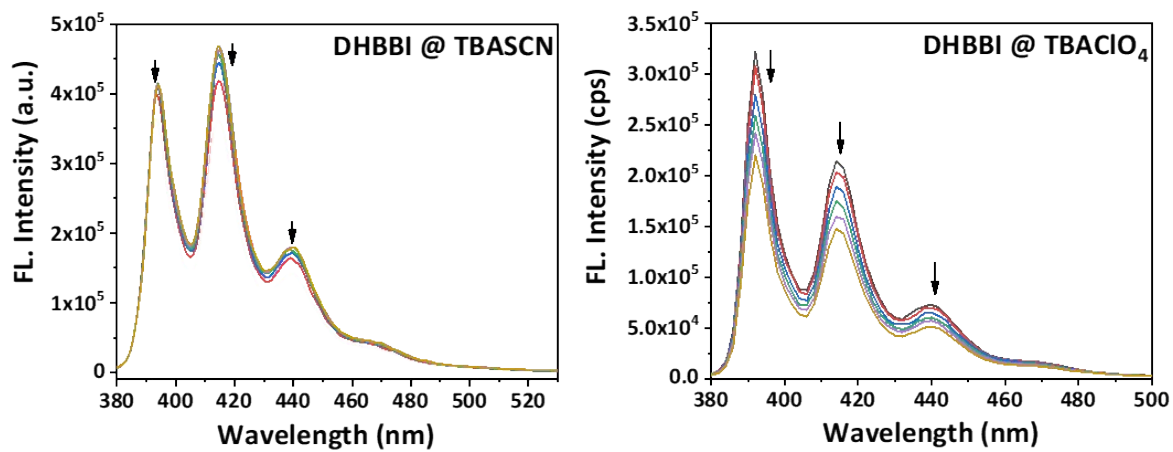

Fig. S15. Fluorescence quenching behaviour of DHBBI with different anionic analytes in ACN.



Table S5. Summary of the calculated  $K_{sv}$  values ( $M^{-1}$ ) of different DHBBI and its derivatives with various anion analytes.

| Analyte             | DHBBI              | DHBBI-OH           | 2-DHBBI-OH         | DHBBI-Hex          |
|---------------------|--------------------|--------------------|--------------------|--------------------|
| TBAF                | $11.6 \times 10^4$ | $8.82 \times 10^4$ | $6.67 \times 10^4$ | $2.93 \times 10^4$ |
| TBACN               | $10.2 \times 10^4$ | $8.02 \times 10^4$ | $7.25 \times 10^4$ | $7.95 \times 10^4$ |
| TBAOH               | $9.38 \times 10^4$ | $8.30 \times 10^4$ | $8.30 \times 10^4$ | $6.58 \times 10^4$ |
| TBABr               | $7.94 \times 10^4$ | $6.85 \times 10^4$ | $8.68 \times 10^4$ | $8.86 \times 10^4$ |
| TBACl               | $8.27 \times 10^4$ | $6.62 \times 10^4$ | $5.27 \times 10^4$ | $6.99 \times 10^4$ |
| TBAI                | $7.99 \times 10^4$ | $8.25 \times 10^4$ | $2.68 \times 10^4$ | $6.63 \times 10^4$ |
| TBANO <sub>3</sub>  | $8.27 \times 10^4$ | $7.62 \times 10^4$ | $5.52 \times 10^4$ | $6.57 \times 10^4$ |
| TBAHSO <sub>4</sub> | $5.37 \times 10^4$ | $7.71 \times 10^4$ | $8.23 \times 10^4$ | $6.27 \times 10^4$ |
| TBAClO <sub>4</sub> | $8.97 \times 10^4$ | $7.71 \times 10^4$ | $6.92 \times 10^4$ | $4.68 \times 10^4$ |
| TBASCN              | $4.86 \times 10^4$ | $5.94 \times 10^4$ | $4.68 \times 10^4$ | $6.55 \times 10^4$ |

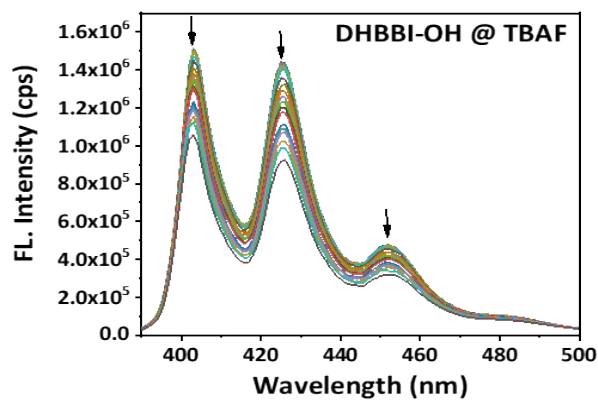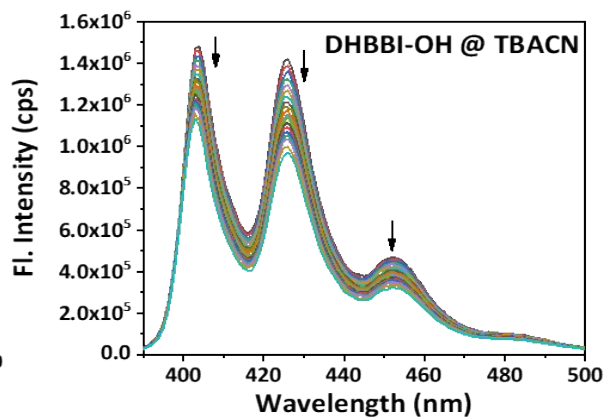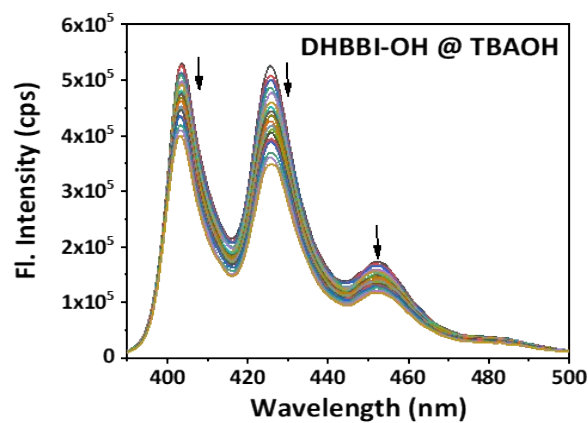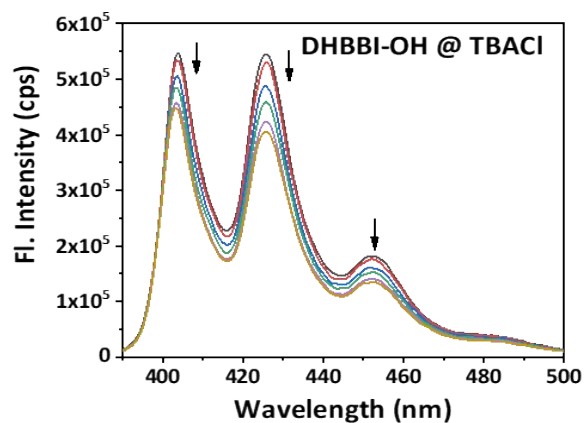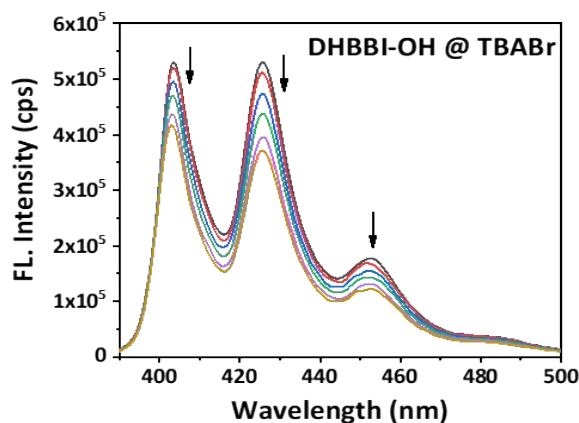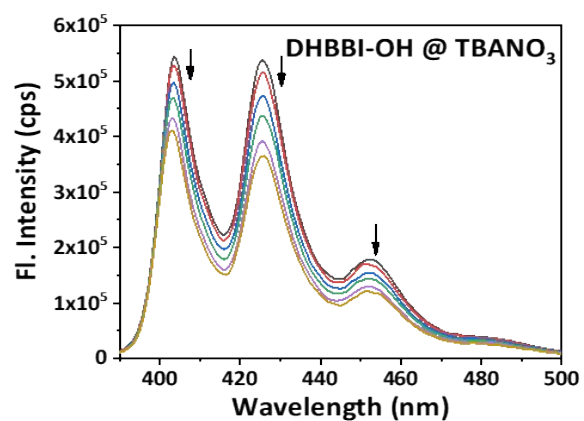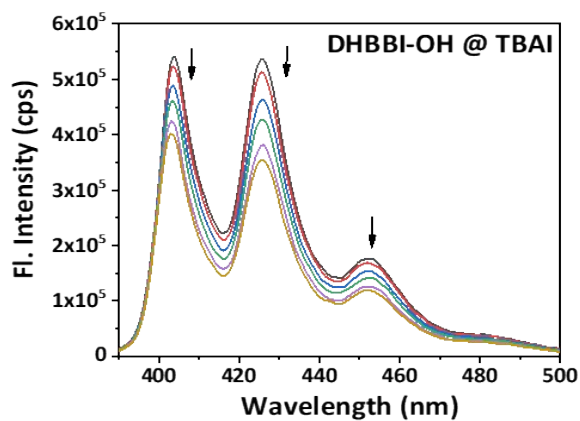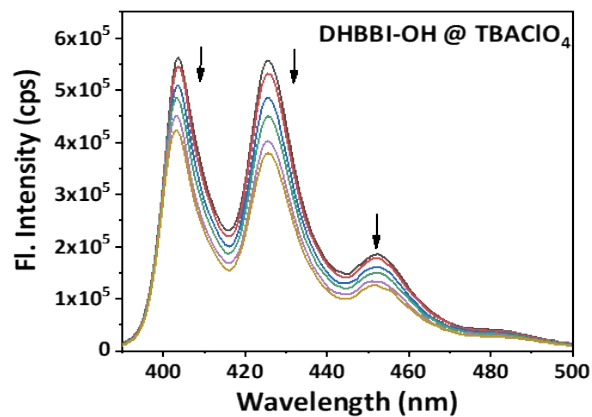

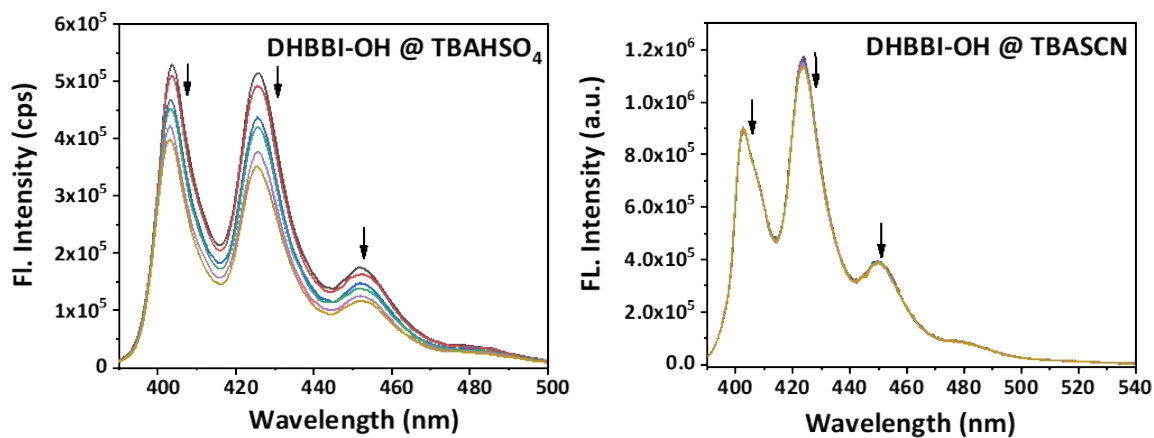

Fig. S16. Fluorescence quenching behaviour of DHBBI-OH with different anionic analytes in ACN.

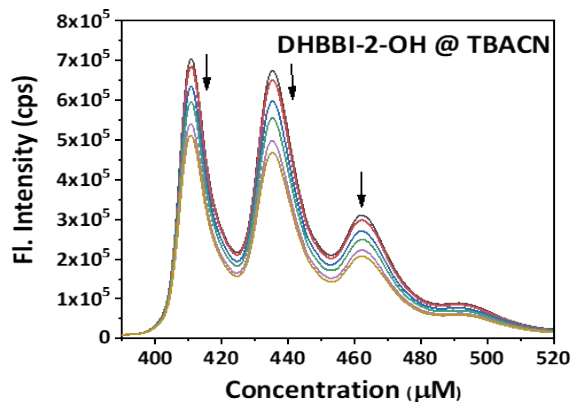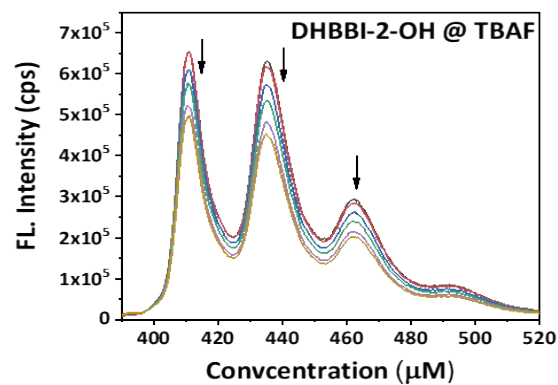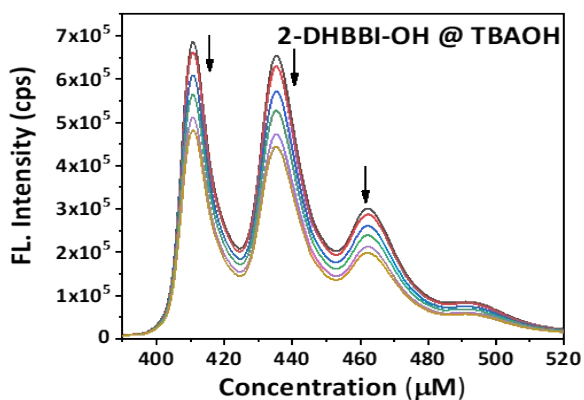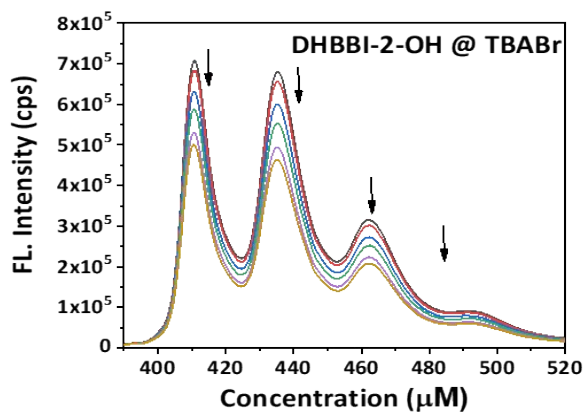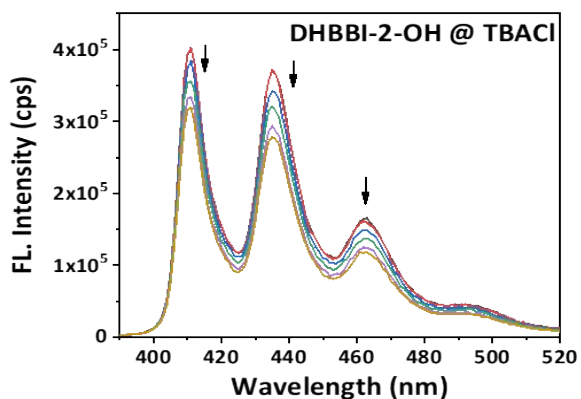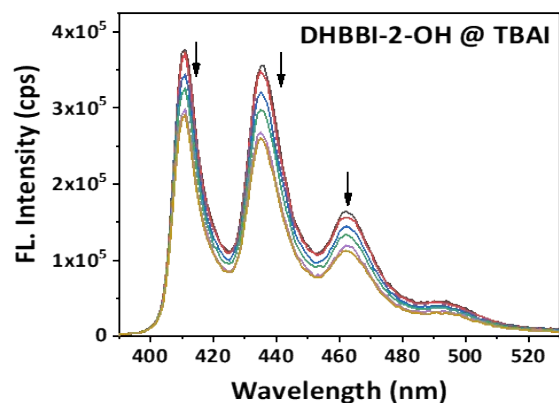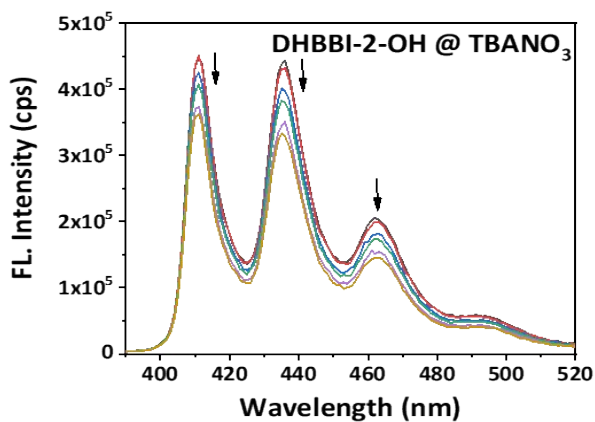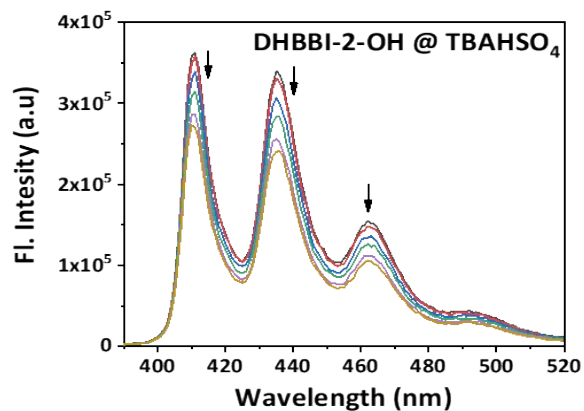

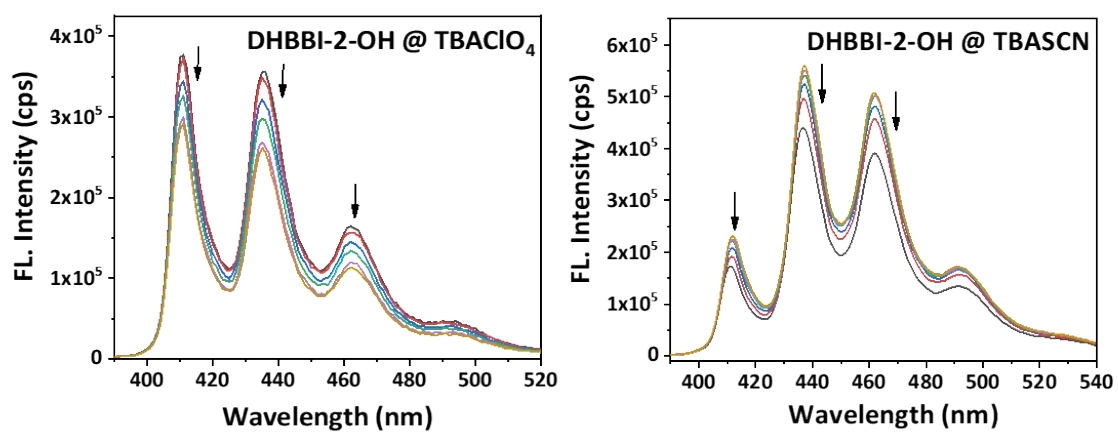

Fig. S17. Fluorescence quenching behaviour of DHBBI-2-OH with different anionic analytes in ACN.

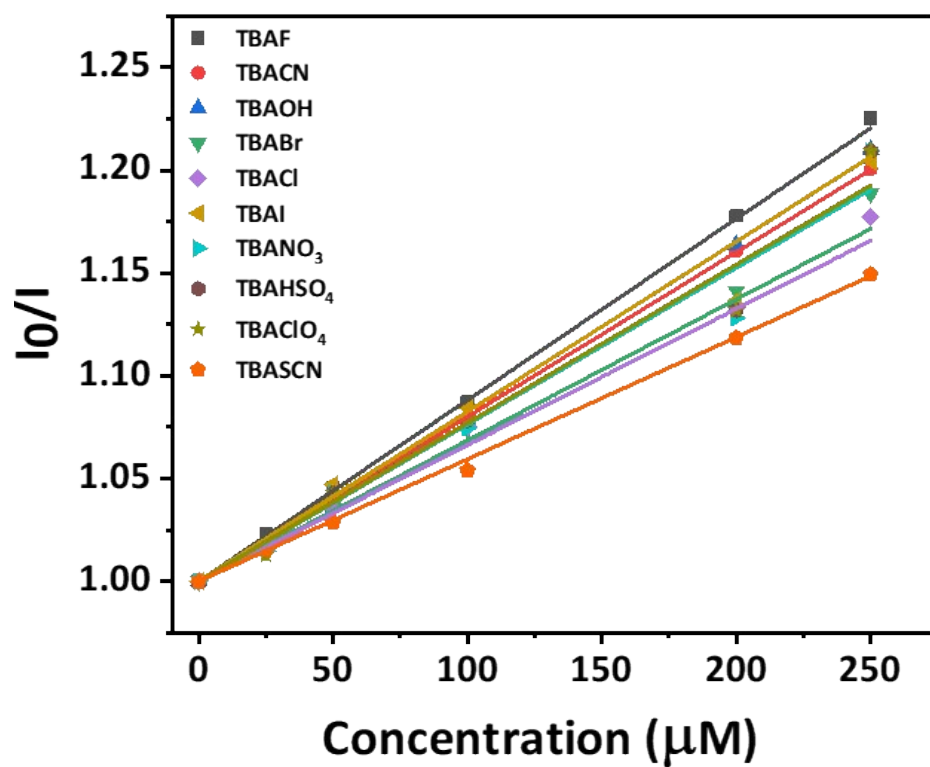

Fig. S18. Comparison in the Stern-Volmer plot of DHBBI-OH with different anion analytes.

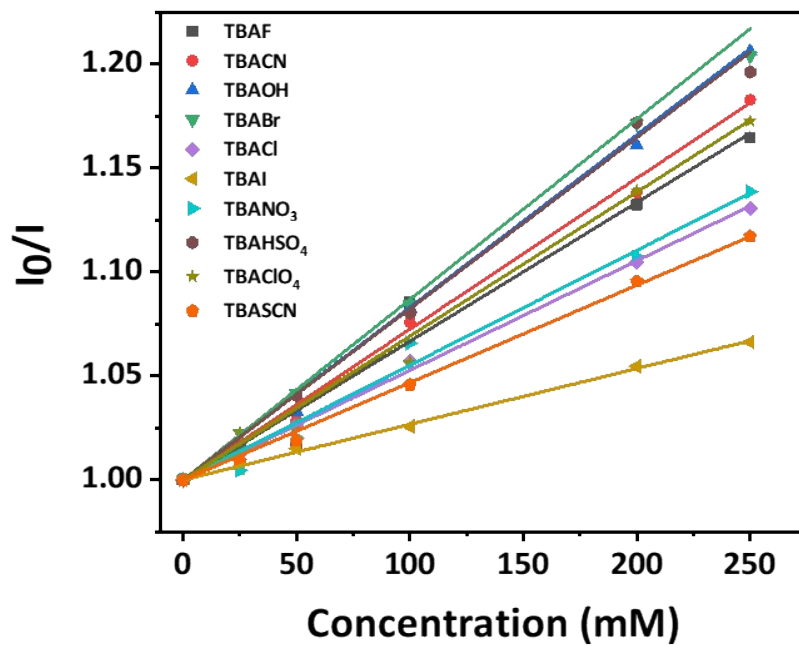

Fig. S19. Comparison in the Stern-Volmer plot of DHBBI-2-OH with different anion analytes.

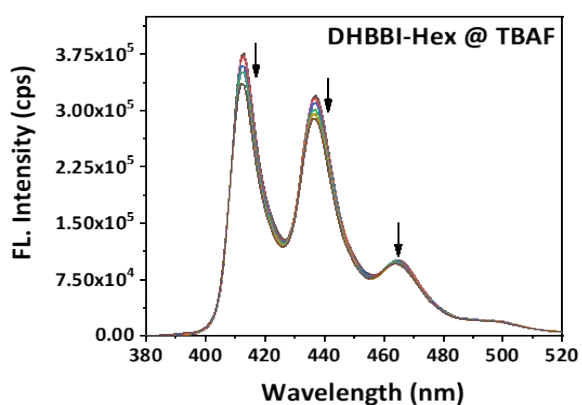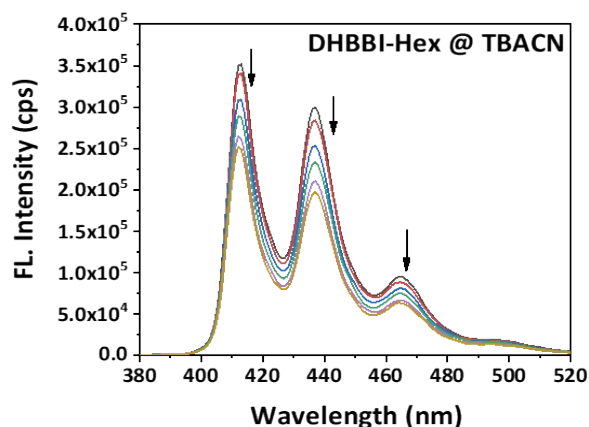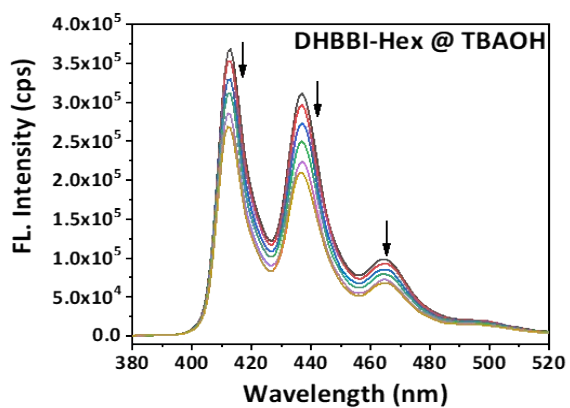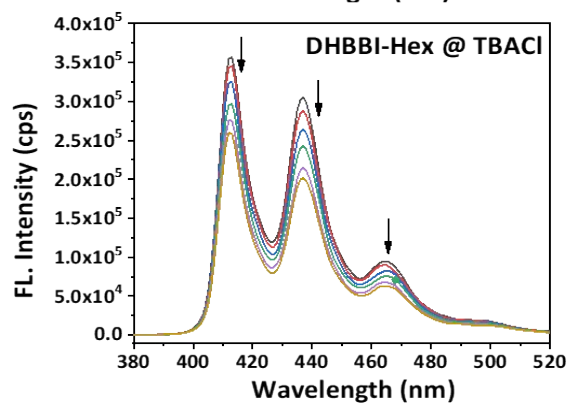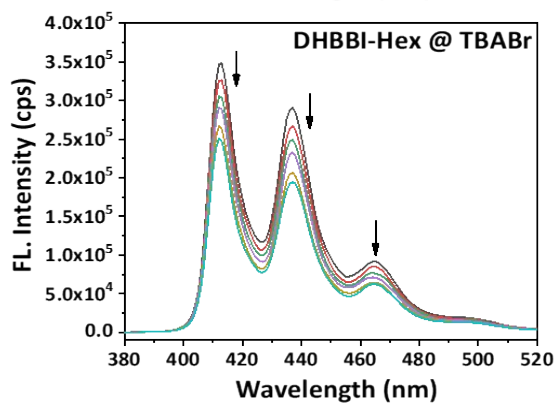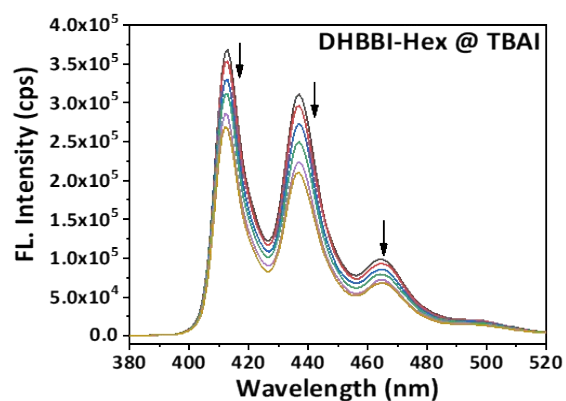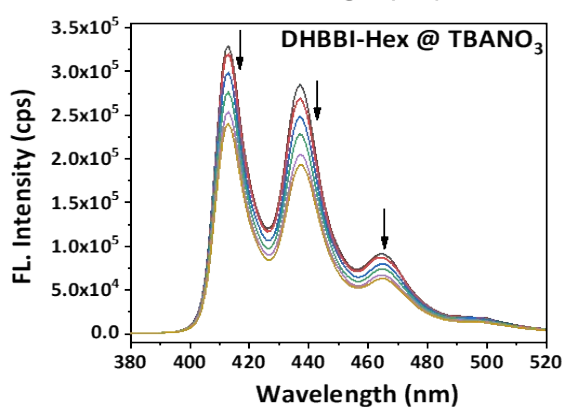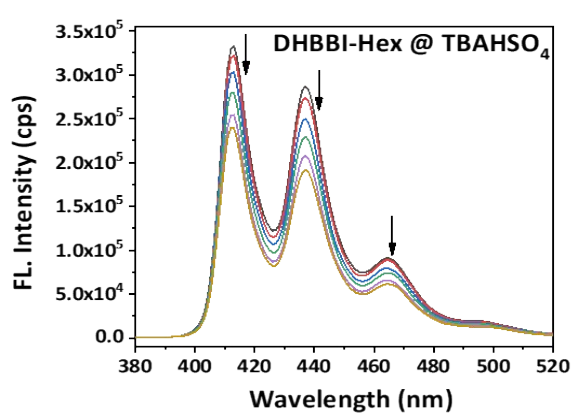



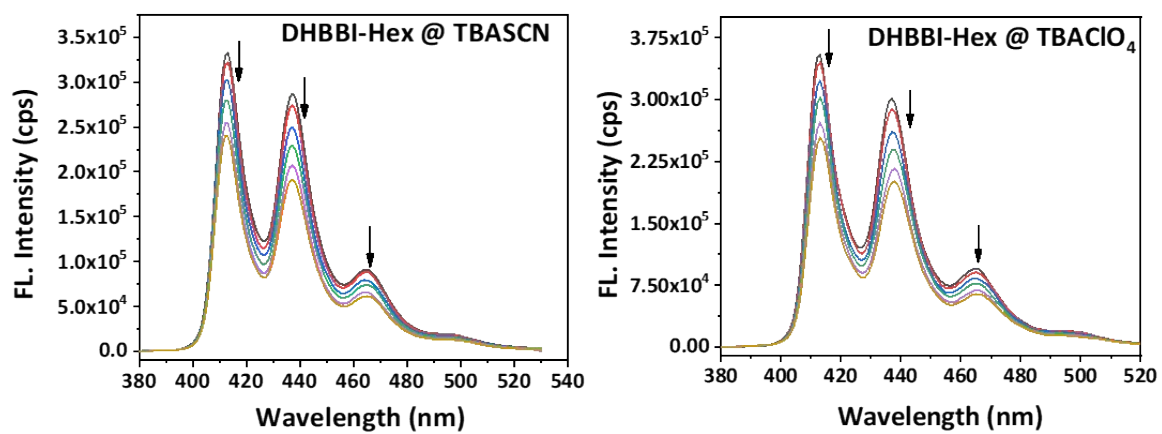

Fig. S20. Fluorescence quenching behaviour of DHBBI-Hex with different anionic analytes in ACN.

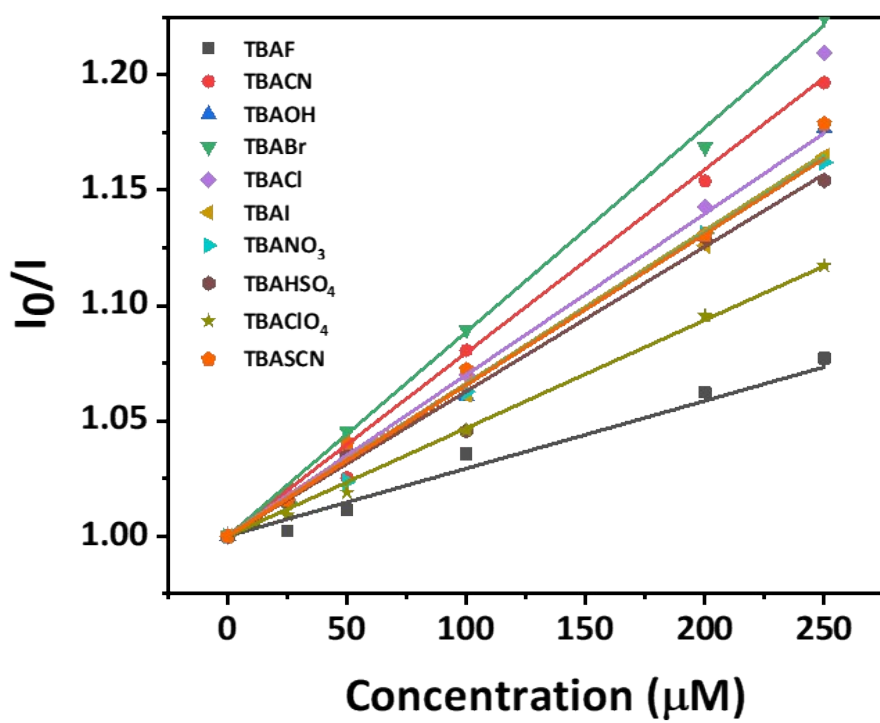

Fig. S21. Comparison in the Stern-Volmer plot of DHBBI-Hex with different anion analytes.

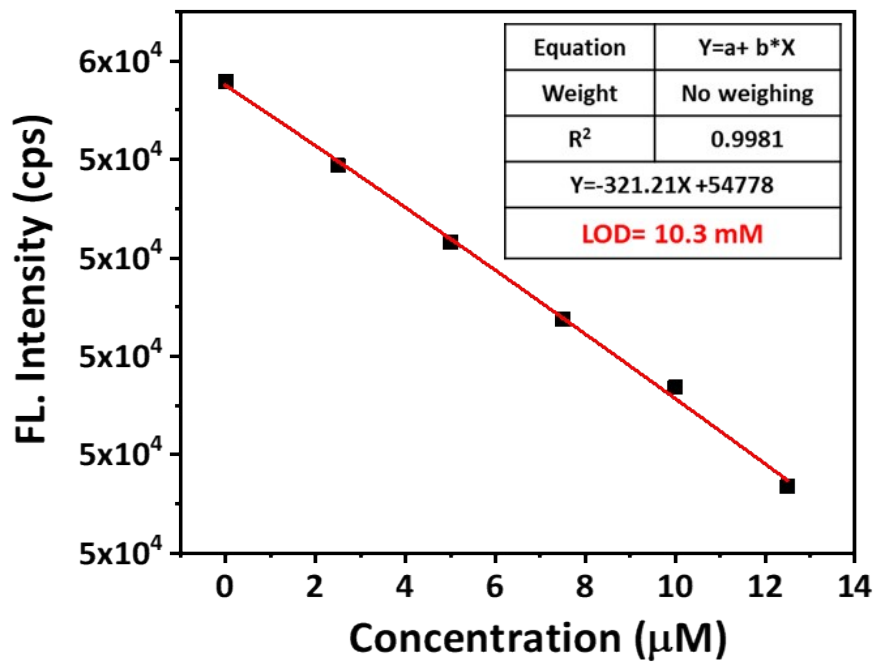

Fig. S22. Change in the emission intensity of DHBBi at different F<sup>-</sup> concentrations.

Table S6. Summary of the calculated lifetime values of different DHBBI with F<sup>-</sup> anion.

| Compound Name        | T (ns) | $\chi^2$ |
|----------------------|--------|----------|
| DHBBI                | 1.905  | 1.0130   |
| DHBBI: TBAF (1:0.1)  | 1.895  | 1.0844   |
| DHBBI: TBAF (1:0.25) | 2.000  | 1.1242   |
| DHBBI: TBAF (1:0.50) | 1.972  | 1.0663   |
| DHBBI: TBAF (1:0.75) | 2.015  | 1.1341   |
| DHBBI: TBAF (1:1)    | 2.054  | 1.0049   |
| DHBBI: TBAF (1:2)    | 2.084  | 1.1719   |
| DHBBI: TBAF (1:5)    | 2.358  | 1.0043   |

Table S7. Comparison of DHBBI with already reported F<sup>-</sup> responsive probes

| S. No | Compound Name                                                                                                                            | Medium               | Binding constant                  | Ref.              |
|-------|------------------------------------------------------------------------------------------------------------------------------------------|----------------------|-----------------------------------|-------------------|
| 1     | 4-(Dimethylamino)salicylaldehyde                                                                                                         | ACN                  | $4.13 \times 10^4 \text{ M}^{-1}$ | 1                 |
| 2     | 2-(2-(dimethylamino)ethylamino)-3-chloronaphthalene-1,4-dione (R1) and its Zn metal chelates [Zn(R1)Cl <sub>2</sub> ]                    | DMF                  | $6.2 \times 10^4 \text{ M}^{-1}$  | 2                 |
| 3     | 2,3-di(1H-2-pyrrolyl)-7,12-dihydronaphtho[2,3-f]quinoxaline-7,12-dione                                                                   | DMSO/DCM             | $1.6 \times 10^4 \text{ M}^{-1}$  | 3                 |
| 4     | 10-(6-Amino-1,3-dimethyl-2,4-dioxo-1,2,3,4-tetrahydro-pyrimidin-5-yl)-1,3-dimethyl-1,10-dihydro-9-oxa-1,3-diaza-anthracene-2,4-dione (1) | ACN                  | $3.15 \times 10^4 \text{ M}^{-1}$ | 4                 |
| 5     | 2-(4-Nitro-phenyl)-4,5-diphenyl-1H-imidazole                                                                                             | ACN:H <sub>2</sub> O | $1.42 \times 10^4 \text{ M}^{-1}$ | 5                 |
| 6     | 2,7-dihydrobenzo[1,2,3-cd:4,5,6-c'd']bis(indazole) (DHBBI)                                                                               | ACN                  | $11.6 \times 10^4 \text{ M}^{-1}$ | This present work |

## References

- 1 K. Liu, X. Zhao, Q. Liu, J. Huo, H. Fu and Y. Wang, Turn on ESPT: Novel salicylaldehyde based sensor for biological important fluoride sensing, *J. Photochem. Photobiol. B Biol.*,

- 2014, **138**, 75–79.
- 2 C. Parthiban and K. P. Elango, Amino-naphthoquinone and its metal chelates for selective sensing of fluoride ions, *Sens. Actuators B Chem.*, 2015, **215**, 544–552.
  - 3 T. Ghosh, B. G. Maiya and M. W. Wong, Fluoride Ion receptors based on dipyrrolyl derivatives bearing electron-withdrawing groups: Synthesis, optical and electrochemical sensing, and computational studies, *J. Phys. Chem. A*, 2004, **108**, 11249–11259.
  - 4 N. Kaur and G. Jindal, "Switch on" fluorescent sensor for the detection of fluoride ions in solution and commercial tooth paste, *Spectrochim. Acta Part A Mol. Biomol. Spectrosc.*, 2019, **223**, 117361.
  - 5 S. Goswami and R. Chakrabarty, An imidazole-based colorimetric sensor for fluoride anion, *Eur. J. Chem.*, 2011, **2**, 410–415.
